# Supplementary material
Source: MDPI journal article supplement (https://www.mdpi.com/2073-4441/15/10/1829)

**Table S1.** Diversity index and amplicon sequence variants (ASVs) of samples in closed and open lakes.

|             | <b>Samples</b> | <b>ASV</b> | <b>Chao 1</b> | <b>Shannon</b> | <b>Coverage</b> | <b>Reads</b> |
|-------------|----------------|------------|---------------|----------------|-----------------|--------------|
| Open lake   | L1             | 2314       | 3687.52       | 5.27           | 0.981           | 69030        |
|             | L2             | 2716       | 3781.24       | 5.13           | 0.977           | 76147        |
|             | L3             | 2358       | 3656.05       | 5.04           | 0.980           | 67318        |
|             | L4             | 2282       | 3243.61       | 5.03           | 0.981           | 57360        |
|             | L5             | 2528       | 3715.42       | 5.14           | 0.978           | 57892        |
|             | R1             | 2721       | 3200.26       | 5.02           | 0.976           | 73389        |
|             | R2             | 2688       | 3680.22       | 5.15           | 0.976           | 77144        |
|             | R3             | 2354       | 3332.41       | 5.01           | 0.981           | 63133        |
|             | R4             | 2756       | 3293.66       | 5.15           | 0.976           | 75097        |
|             | R5             | 2866       | 3872.27       | 5.10           | 0.974           | 75071        |
| Closed lake | L1             | 533        | 578.77        | 1.29           | 0.997           | 89270        |
|             | L2             | 570        | 651.56        | 1.33           | 0.996           | 88689        |
|             | L3             | 424        | 489.43        | 1.04           | 0.997           | 103069       |
|             | L4             | 1688       | 1760.54       | 4.08           | 0.994           | 51646        |
|             | L5             | 1680       | 1721.22       | 4.00           | 0.995           | 45778        |
|             | L6             | 1524       | 1617.87       | 4.01           | 0.994           | 50102        |
|             | L7             | 954        | 1078.74       | 2.01           | 0.995           | 67057        |
|             | L8             | 1264       | 1408.65       | 2.67           | 0.993           | 74782        |
|             | L9             | 742        | 851.861       | 1.93           | 0.995           | 72741        |
|             | L10            | 1040       | 1224.50       | 2.94           | 0.994           | 97349        |
|             | L11            | 908        | 1068.87       | 2.48           | 0.994           | 95276        |
|             | L12            | 1026       | 1227.81       | 3.07           | 0.993           | 90321        |
|             | L13            | 1276       | 1493.28       | 2.90           | 0.992           | 89348        |
|             | L14            | 1162       | 1359.04       | 2.87           | 0.993           | 88082        |
|             | L15            | 1360       | 1572.29       | 3.58           | 0.992           | 84196        |

|  |     |      |         |      |       |       |
|--|-----|------|---------|------|-------|-------|
|  | L16 | 1332 | 1518.70 | 3.37 | 0.993 | 72519 |
|  | L17 | 1241 | 1435.44 | 3.36 | 0.993 | 75569 |
|  | L18 | 1053 | 1203.01 | 2.80 | 0.994 | 79049 |

**Table S2.** Correlation analysis between diversity index and significant environmental variables in closed and open lakes.

| R       | Open lake          |                    |                              | Closed lake       |                   |
|---------|--------------------|--------------------|------------------------------|-------------------|-------------------|
|         | EC                 | COD                | NH <sub>4</sub> <sup>+</sup> | pH                | ORP               |
| Chao 1  | -0.46 <sup>*</sup> | 0.15 <sup>*</sup>  | 0.14 <sup>*</sup>            | 0.26 <sup>*</sup> | 0.16 <sup>*</sup> |
| Shannon | -0.61 <sup>*</sup> | 0.83 <sup>**</sup> | 0.56 <sup>*</sup>            | 0.43 <sup>*</sup> | 0.35 <sup>*</sup> |

\*  $p < 0.05$ , \*\*  $p < 0.01$ , \*\*\*  $p < 0.001$ .

**Table S3.** Physicochemical parameters of samples in closed and open lakes.

|             |    | T    | TN   | NO <sub>3</sub> <sup>-</sup> | NO <sub>2</sub> <sup>-</sup> | Chla              |      | DO    | EC    | ORP | COD   | BOD  | NH <sub>4</sub> <sup>+</sup> | TP   |
|-------------|----|------|------|------------------------------|------------------------------|-------------------|------|-------|-------|-----|-------|------|------------------------------|------|
| Samples     |    | °C   | mg/L | mg/L                         | mg/L                         | mg/m <sup>3</sup> | pH   | mg/L  | us/cm | mv  | mg/L  | mg/L | mg/L                         | mg/L |
| Open lake   | L1 | 20.5 | 0.54 | 0.10                         | 0.27                         | 18.7              | 8.38 | 10.9  | 987   | 120 | 71.8  | 9.7  | 0.36                         | 10.9 |
|             | L2 | 20.5 | 0.29 | 0.07                         | 0.03                         | 3.32              | 7.40 | 11.5  | 1231  | 140 | 64.2  | 6.3  | 0.05                         | 11.5 |
|             | L3 | 23   | 0.72 | 0.72                         | 0.03                         | 6.13              | 7.63 | 6.50  | 1252  | 140 | 95.4  | 1.9  | 0.11                         | 6.5  |
|             | L4 | 21.9 | 0.63 | 0.14                         | 0.04                         | 5.98              | 8.53 | 9.10  | 820   | 138 | 29.4  | 3.1  | 0.09                         | 9.1  |
|             | L5 | 19.3 | 0.91 | 0.43                         | 0.03                         | 33.78             | 8.82 | 12.20 | 953   | 147 | 59    | 8.5  | 0.06                         | 12.2 |
|             | R1 | 19.1 | 0.32 | 0.37                         | 0.30                         | 19.48             | 8.36 | 10.70 | 953   | 145 | 59    | 7.1  | 0.09                         | 10.7 |
|             | R2 | 18.5 | 0.56 | 0.30                         | 0.32                         | 11.91             | 8.75 | 9.50  | 1014  | 120 | 70.2  | 5.8  | 0.3                          | 9.5  |
|             | R3 | 19.2 | 0.44 | 0.20                         | 0.04                         | 15.88             | 8.66 | 11.30 | 956   | 116 | 68.2  | 8.2  | 0.33                         | 11.3 |
|             | R4 | 18.6 | 0.54 | 0.18                         | 0.16                         | 16.45             | 8.33 | 10.10 | 919   | 116 | 67    | 6.5  | 0.33                         | 10.1 |
|             | R5 | 23   | 0.44 | 0.17                         | 0.16                         | 25.29             | 8.70 | 10.10 | 831   | 113 | 75.8  | 6.6  | 0.3                          | 10.1 |
| Closed lake | L1 | 28.3 | 0.50 | 0.39                         | 0.002                        | 4.24              | 8.62 | 8.40  | 550   | 308 | 27.64 | 1.3  | 0.18                         | 0.14 |
|             | L2 | 27.9 | 0.58 | 0.42                         | 0.002                        | 3.26              | 8.45 | 7.80  | 540   | 272 | 39.28 | 1.7  | 0.44                         | 0.31 |
|             | L3 | 28.9 | 0.51 | 0.39                         | 0.007                        | 4.25              | 8.80 | 8.20  | 502   | 217 | 44.94 | 0.8  | 0.14                         | 0.25 |

---

|     |      |      |      |       |       |      |      |     |     |       |     |      |      |
|-----|------|------|------|-------|-------|------|------|-----|-----|-------|-----|------|------|
| L4  | 28.3 | 0.41 | 1.12 | 0.015 | 3.86  | 8.69 | 8.40 | 556 | 218 | 46.68 | 1.7 | 0.22 | 0.20 |
| L5  | 28.6 | 0.34 | 0.25 | 0.002 | 3.19  | 8.99 | 8.30 | 554 | 205 | 46.3  | 0.4 | 0.08 | 0.24 |
| L6  | 29.1 | 0.65 | 0.04 | 0.002 | 3.18  | 9.08 | 9.50 | 562 | 159 | 46.74 | 1.7 | 0.50 | 0.28 |
| L7  | 32.8 | 0.54 | 0.11 | 0.006 | 12.04 | 8.81 | 5.99 | 535 | 199 | 47.24 | 1.6 | 0.23 | 0.31 |
| L8  | 31.5 | 0.51 | 0.35 | 0.005 | 9.29  | 8.64 | 7.16 | 597 | 238 | 48.4  | 2.5 | 0.23 | 0.32 |
| L9  | 32.7 | 0.41 | 0.04 | 0.006 | 7.88  | 8.93 | 8.06 | 586 | 185 | 47.16 | 2.4 | 0.18 | 0.21 |
| L10 | 29.4 | 0.51 | 0.39 | 0.007 | 10.13 | 9.14 | 7.29 | 497 | 183 | 46.2  | 1.9 | 0.09 | 0.15 |
| L11 | 29.9 | 0.69 | 0.63 | 0.011 | 12.85 | 9.18 | 8.54 | 509 | 129 | 47.42 | 2.2 | 0.27 | 0.15 |
| L12 | 29.7 | 0.54 | 0.35 | 0.009 | 12.03 | 9.08 | 6.03 | 514 | 195 | 47.94 | 1.5 | 0.26 | 0.22 |
| L13 | 28.3 | 0.31 | 0.04 | 0.003 | 5.26  | 8.95 | 8.90 | 506 | 179 | 47.74 | 0.8 | 0.07 | 0.17 |
| L14 | 29.9 | 0.33 | 0.08 | 0.003 | 6.48  | 8.91 | 7.91 | 524 | 196 | 44.66 | 1.5 | 0.12 | 0.22 |
| L15 | 30.2 | 0.31 | 0.01 | 0.004 | 4.37  | 8.84 | 6.40 | 531 | 205 | 42.44 | 0.6 | 0.04 | 0.25 |
| L16 | 28.9 | 0.37 | 0.14 | 0.005 | 3.93  | 9.03 | 7.40 | 445 | 222 | 46.5  | 0.9 | 0.05 | 0.35 |
| L17 | 28.5 | 0.20 | 0.04 | 0.003 | 7.18  | 9.05 | 9.50 | 536 | 193 | 42.78 | 0.8 | 0.13 | 0.21 |
| L18 | 30.8 | 0.55 | 0.08 | 0.004 | 2.77  | 8.76 | 6.60 | 529 | 267 | 45.2  | 2.1 | 0.16 | 0.24 |

---

**Table S4.** Topological properties of bacterial co-occurrence networks in closed and open lakes.

|                    | Empirical network |                |                |            |       |     |    |     |       |          | Random network |       |     |
|--------------------|-------------------|----------------|----------------|------------|-------|-----|----|-----|-------|----------|----------------|-------|-----|
|                    | N                 | E              |                | Modularity | avgCC | APL | ND | AD  | GD    | $\sigma$ | Modularity     | avgCC | APL |
|                    |                   | Positive       | Negative       |            |       |     |    |     |       |          |                |       |     |
| <b>Closed lake</b> | 102               | 63<br>(66.3%)  | 32<br>(33.7%)  | 0.85       | 0.11  | 5.8 | 14 | 1.9 | 0.018 | 4.5      | 0.8            | 0.001 | 6.6 |
| <b>Open lake</b>   | 752               | 266<br>(29.6%) | 634<br>(70.4%) | 0.83       | 0.09  | 7.9 | 22 | 2.4 | 0.003 | 3.7      | 0.76           | 0.001 | 7.3 |

N: Nodes; E: Edges; avgCC: Average clustering coefficient; APL: Average path length; ND: network diameter; AD: Average degree; GD:

Graph density;  $\sigma$ : small-world coefficient.

$\sigma = (\text{avgCC}/\text{avgCCr})/(\text{APL}/\text{APLr})$  and  $\sigma > 1$  indicates “small-world” properties.

**Figure S1.** Rarefaction curves of richness of samples in closed and open lakes. **(a)**

Closed lake; **(b)** Open lake.

**Figure S2.** Distribution of bacterial communities at genus levels. **(a)** Closed lake; **(b)**

Open lake.

**Figure S3.** Heatmap representing the abundance of predicted functions based on

FAPROTAX. **(a)** Closed lake; **(b)** Open lake.

**Figure S4.** Mantel test between the Bray–Curtis similarity of bacterial communities

and geographical distance **(a, c)**, physicochemical parameters **(b, d)** in in closed lakes

**(a, b)** and open lakes **(c, d)**.

**Figure S1.**

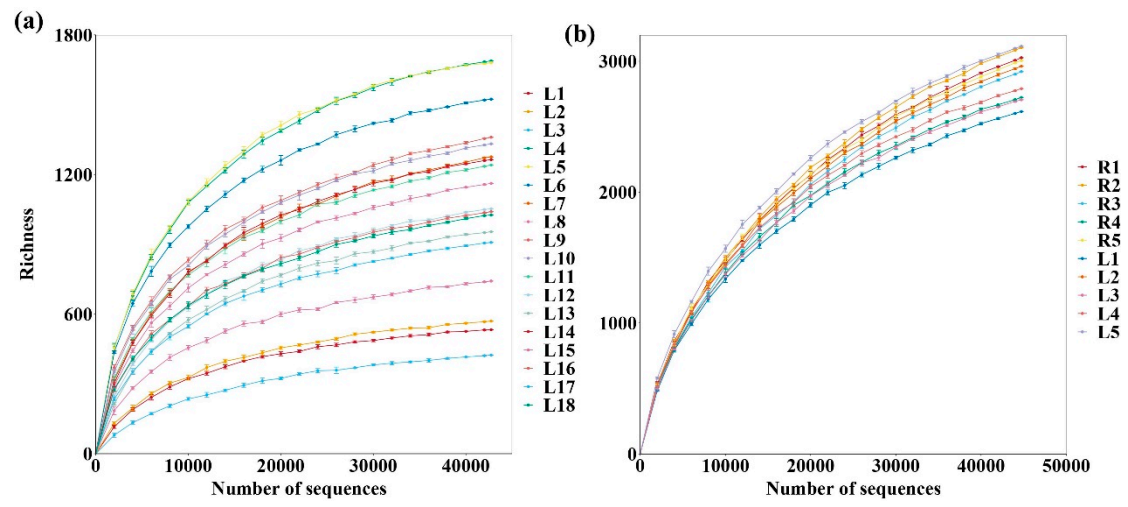



Figure S2.

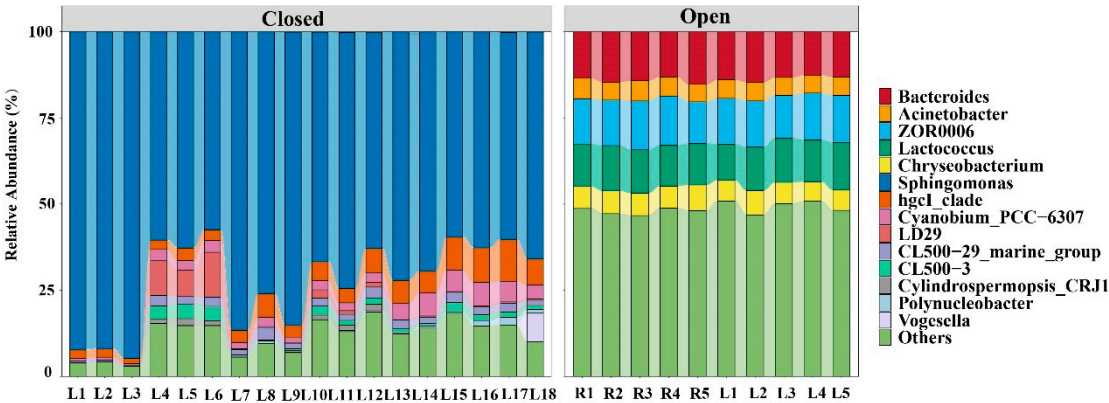

**Figure S3.**

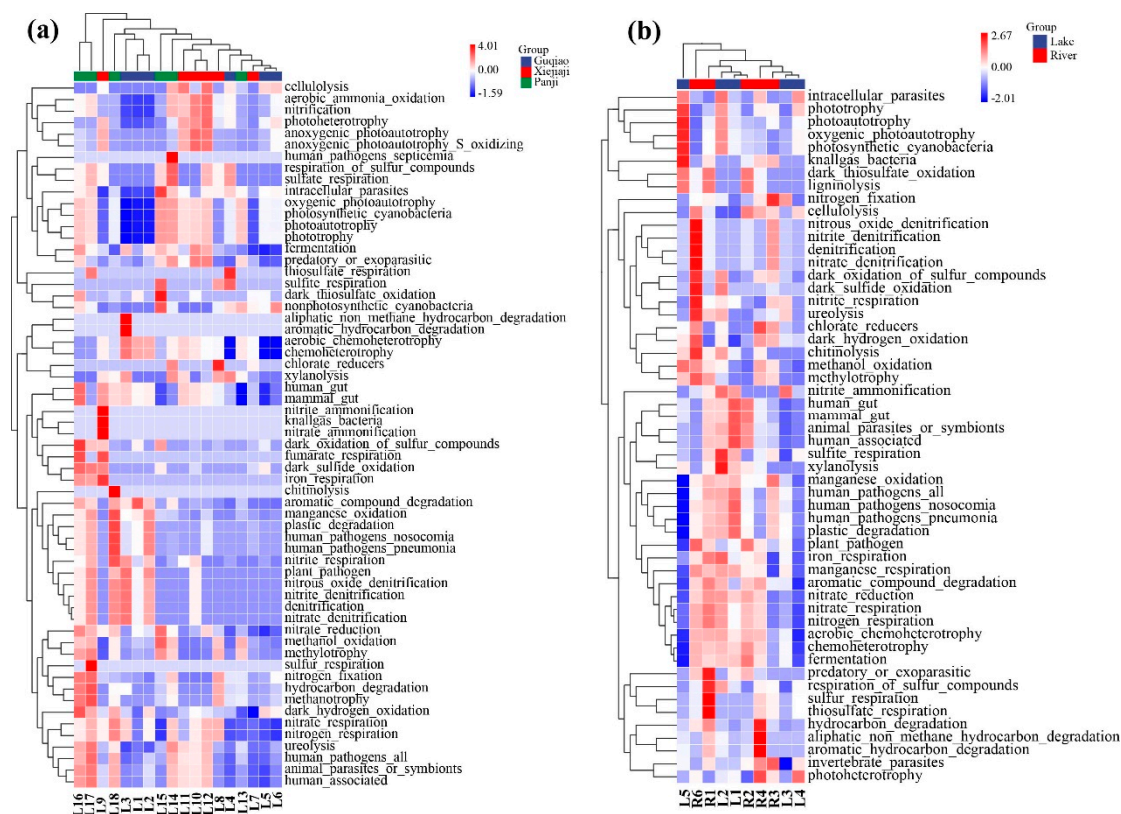

**Figure S4**

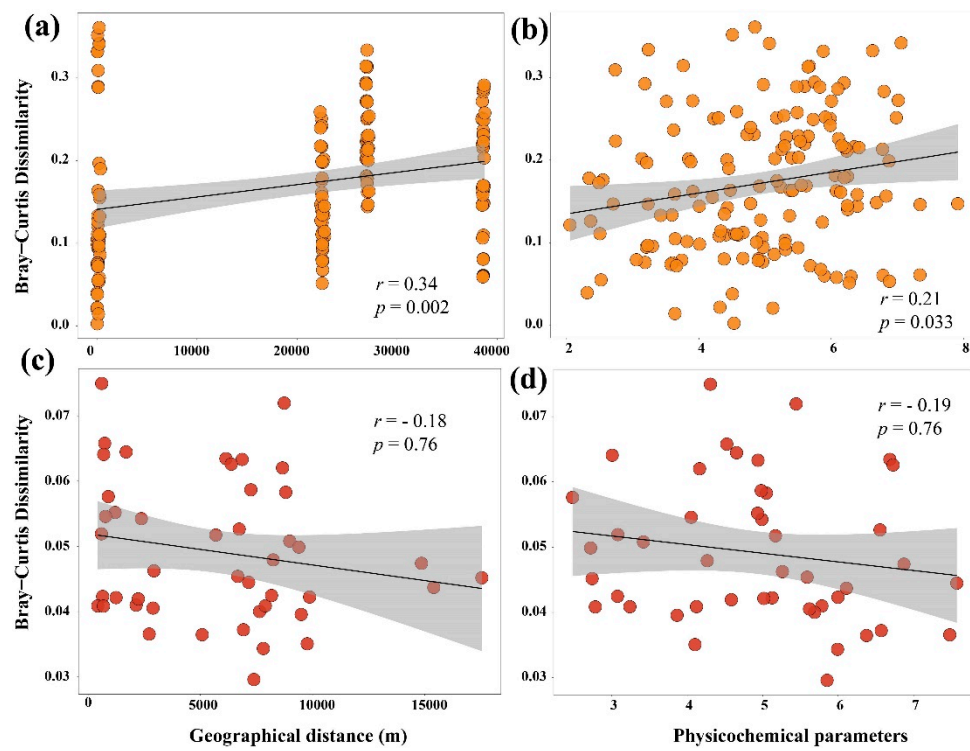

Supplement: s1 [file s1]
